# Supplementary material
Source: Springer Nature journal article supplement (https://www.springermedizin.de/resource/supplementary/13048_2010_62_MOESM2_ESM.pdf/9664854)
Supplement: MOESM2 [file 9664854]

HEN OVARY

HUMAN OVARY

CONTROLS

100 kD →

70 kD →

50 kD →

20 kD →

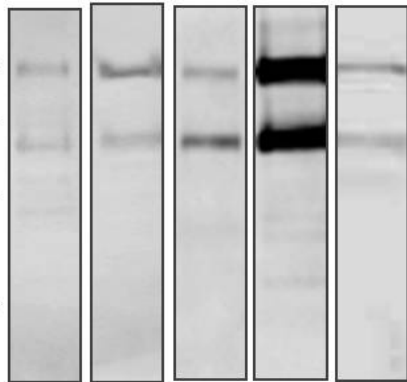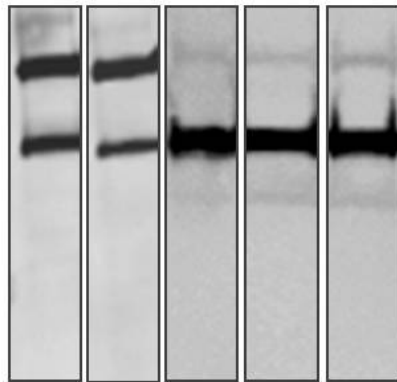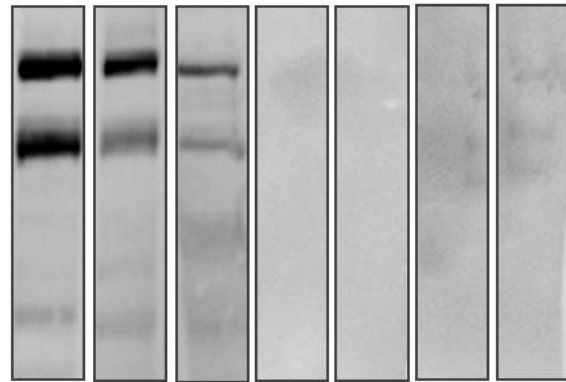

**Normal**

**OVCA**

**Normal**

**OVCA**

Hen Spleen Hen Brain Rat Brain Hen 2<sup>nd</sup> AB only Human +block peptide Hen Human
